# Supplementary material for: Roles of adenine methylation in the physiology of Lacticaseibacillus paracasei
Source: PubMed Central journal article supplement (PMC10164179; doi:10.1038/s41467-023-38291-1), 2023-05-06
Supplement: 41467_2023_38291_MOESM1_ESM.pdf [file 41467_2023_38291_MOESM1_ESM.pdf]

## Supplementary Information

Roles of adenine methylation in the physiology of *Lacticaseibacillus paracasei*  
Zhao and Zhang et al.

# Markov Chain Model – Cluster of Orthologous Groups of Proteins

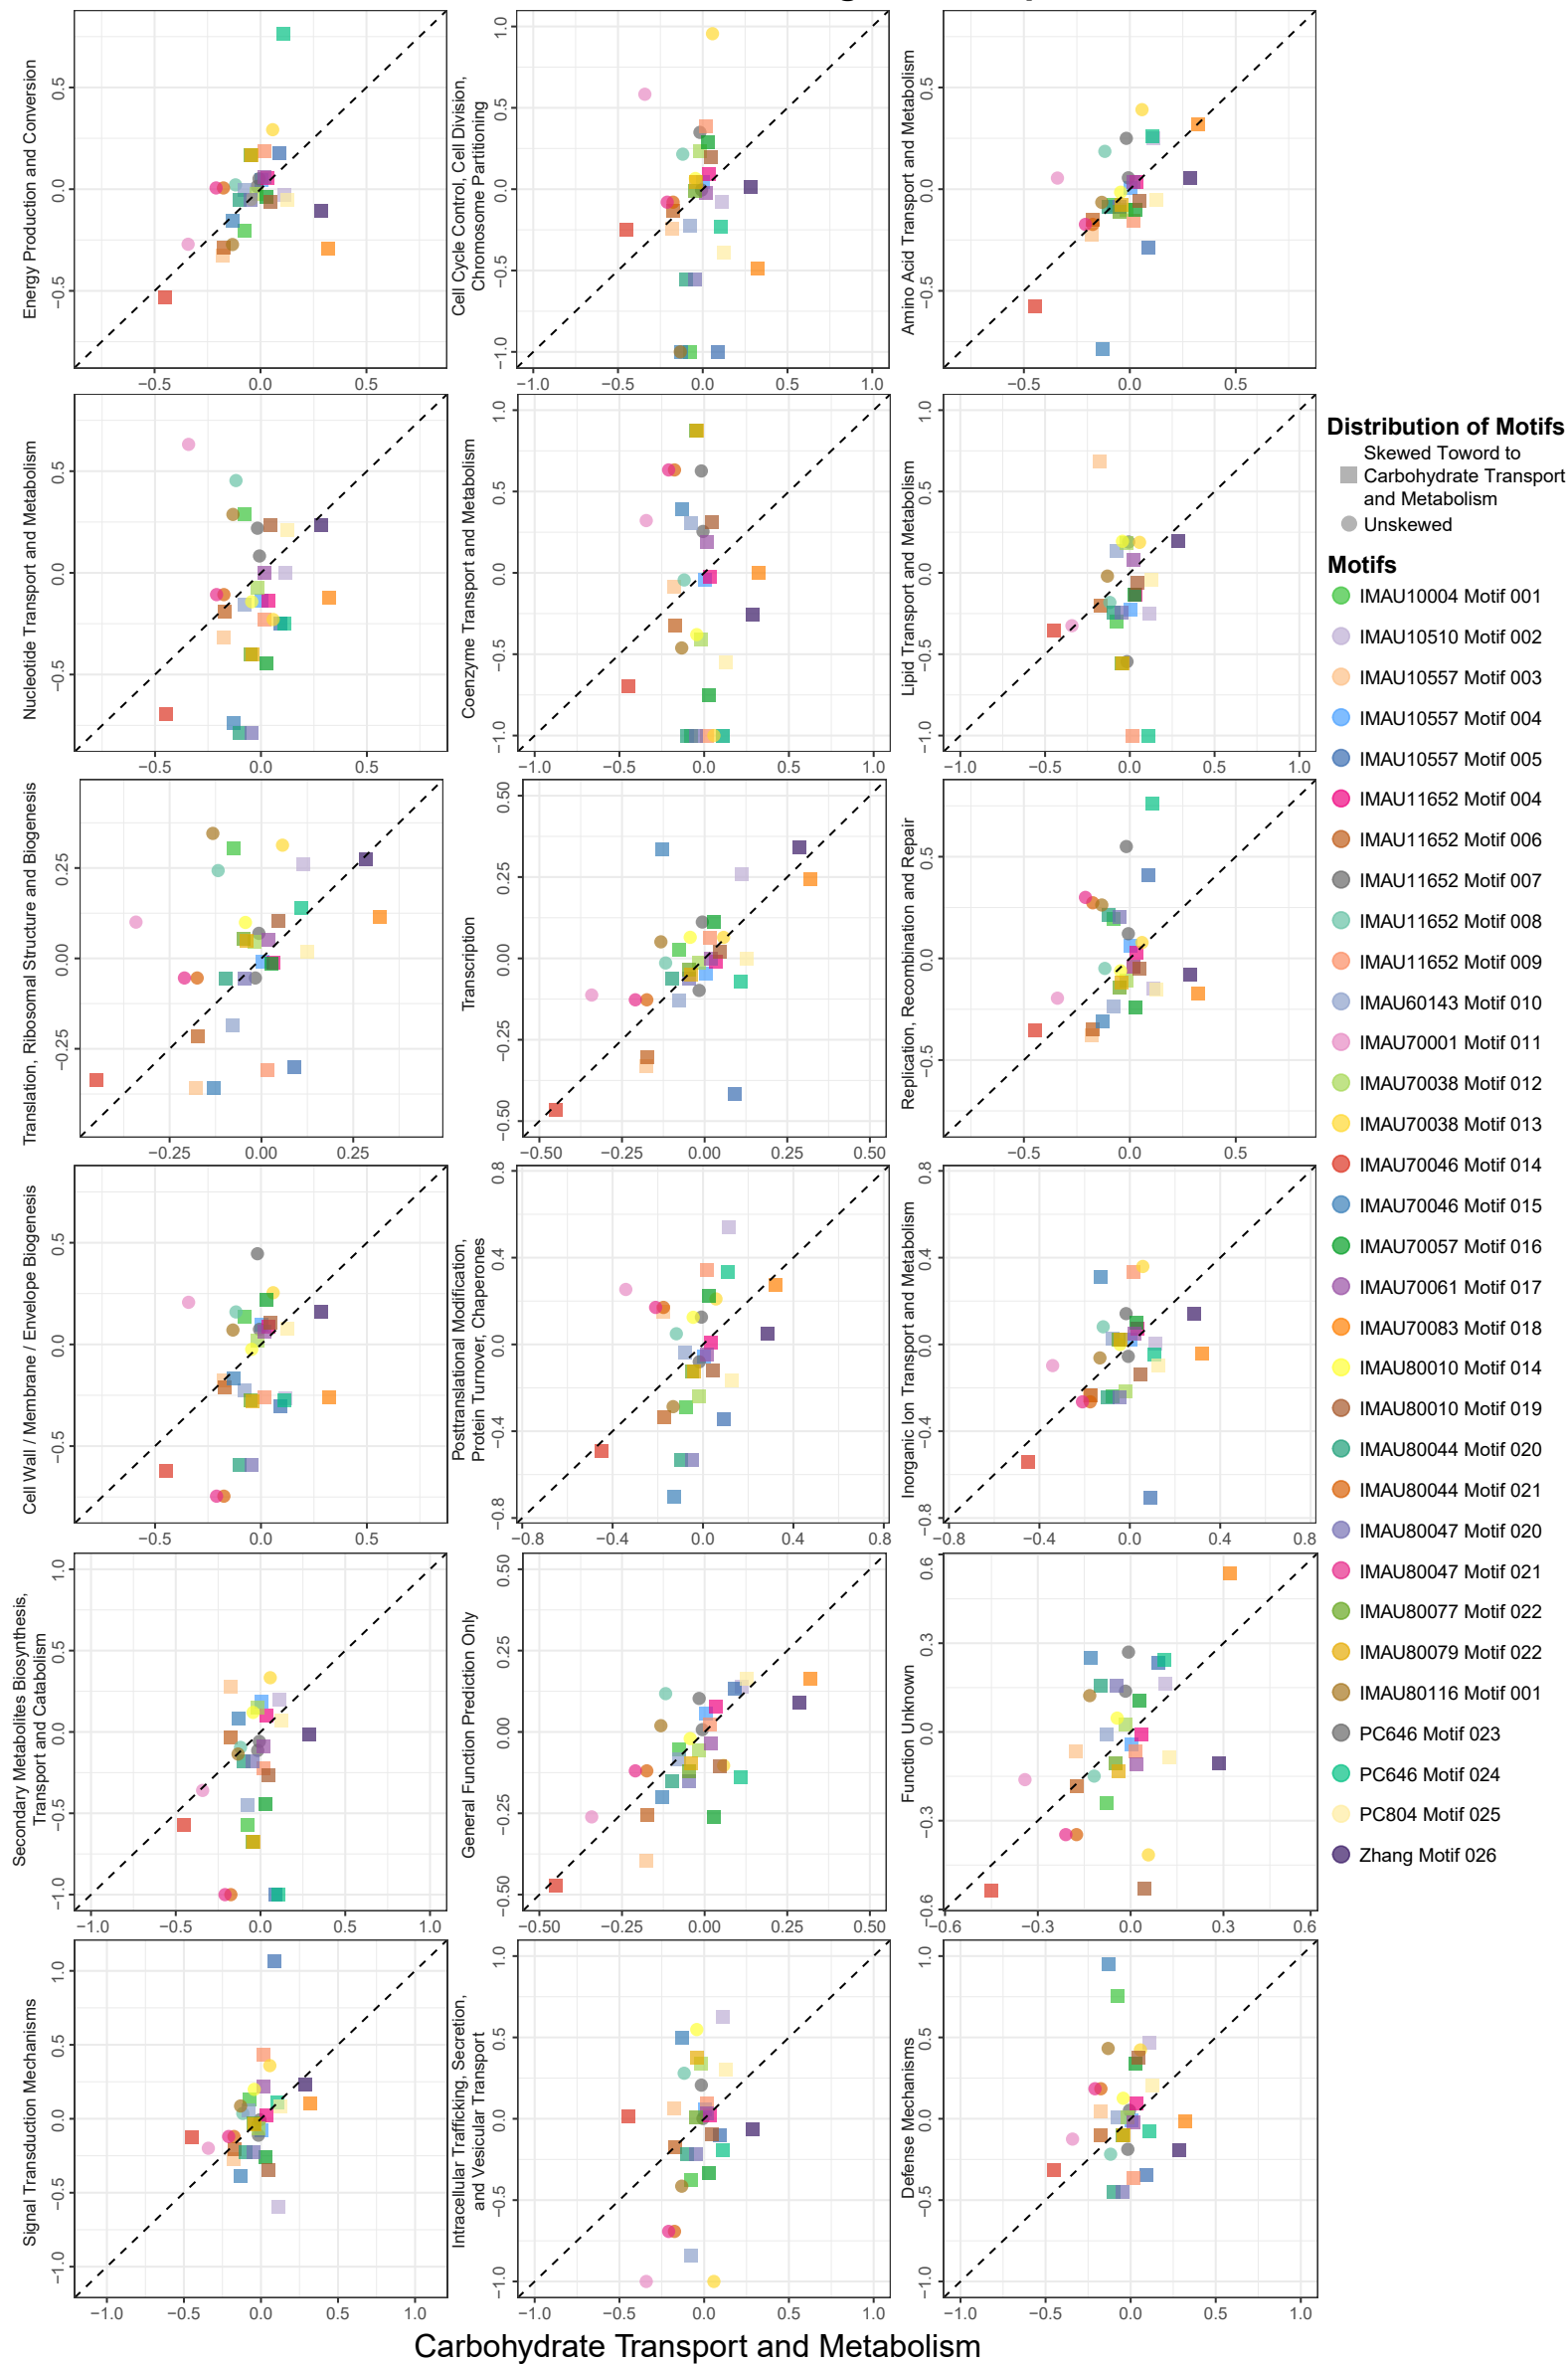

**Figure S1 Skewed distribution of methylation sites towards the coding sequences (CDS) of genes in the Clusters of Orthologous Groups of proteins (COG) functional category of carbohydrate transport and metabolism [G].** The results are generated by the Markov chain approach that considers composition. The distance between a symbol and its projection on the diagonal line measures the extent of usage biases between the COG functional category [G] and each of the other 18 COG functional categories shown. Symbols below and above the diagonal line represent skewing towards the COG functional category [G] and the COG functional category specified in each plot, respectively. Strains with more than nine (among the 18) COG functional categories located below the diagonal line are considered to have an overall skewed distribution (towards the COG functional category [G]). Each symbol represents the data of a specific motif, and each motif is represented by a different color, assigned to a specific number. Motifs of skewed and unskewed distribution are represented by a square or a circle, respectively.



**Figure S2 Heatmap showing the distribution of methylation sites across coding sequences of 20 *Lactocaseibacillus paracasei* isolates, annotated based on the Kyoto Encyclopedia of Genes and Genomes (KEGG) database.** X-axis shows the isolate number; y-axis indicates the specific KEGG category. The color scale represents the percentage of methylation sites in a specific KEGG Orthology (KO), calculated as: the number of methylation sites within the coding sequences of a specific KO divided by the total number of methylation sites across all KOs. The quotient was converted to permillage. The color bar represents the relative distribution of m6A methylation in various KOs.

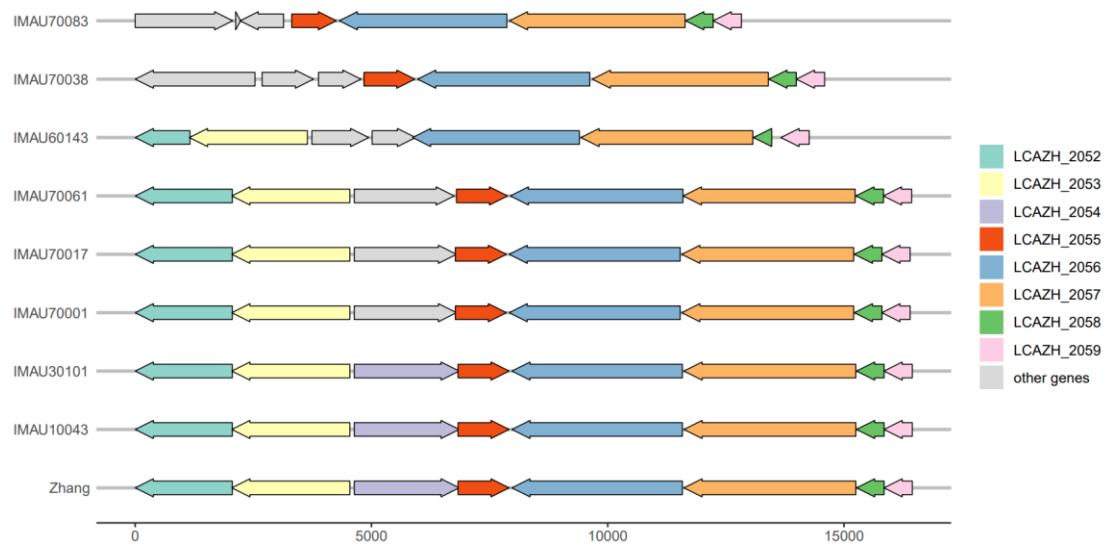

**Figure S3 Comparative analysis of the gene organization of the bacteriophage exclusion (BREX) system in various *Lacticaseibacillus paracasei* strains.** A complete or partial BREX gene cluster was detected in nine of the 28 investigated strains. A complete BREX system cassette in this species (previously identified in *Lacticaseibacillus paracasei* Zhang) includes eight genes, namely LCAZH\_2052 (protease Lon-related BREX system protein *BrxL*, *brxL*), LCAZH\_2053 (phosphatase PglZ type A, *pglZ*), LCAZH\_2054 (a putative DNA MTase), LCAZH\_2055 (site-specific integrase, *int*), LCAZH\_2056 (adenine-specific DNA-methyltransferase, *pglX*), LCAZH\_2057 (P-loop protein *BrxC*, *brxC*), LCAZH\_2058 (DUF1788 domain-containing protein, *brxB*), and LCAZH\_2059 (DUF1819 family protein, *brxA*). Colored arrows represent different genes, and the arrow head represents gene orientation. The scale at the bottom indicates gene length (bp).

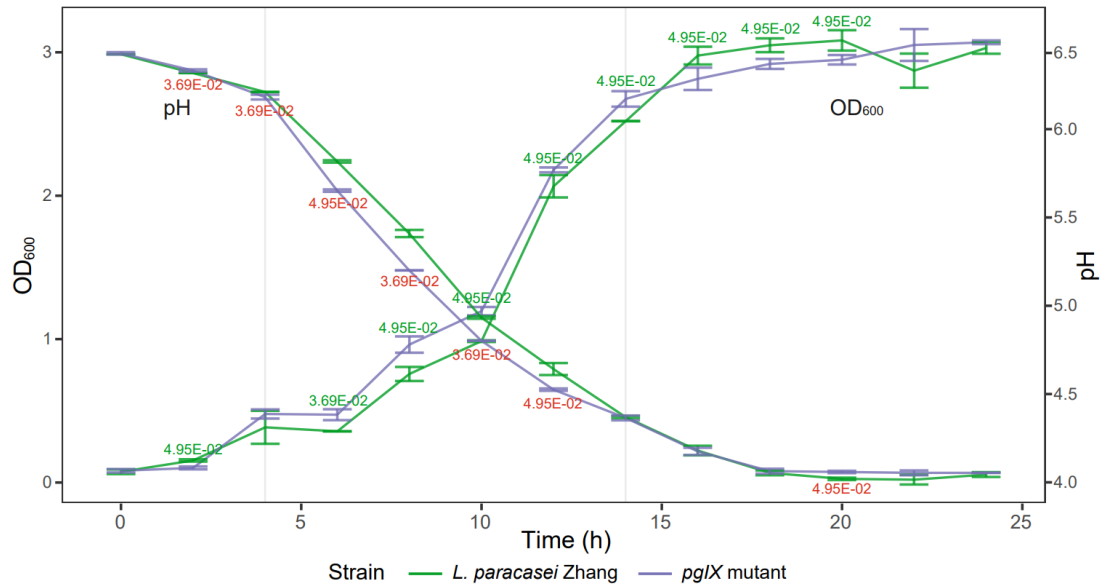

**Figure S4 Growth curves of *Lacticaseibacillus (L.) paracasei* Zhang wild type (n = 3) and *pglX* mutant (n = 3), determined by changes in optical density at 600 nm (OD<sub>600</sub>) and pH of the bacterial cultures over time.** X-axis indicates different time points; y-axis indicates OD<sub>600</sub> and pH. The logarithmic growth phase (from 4 h to 14 h) is framed by two vertical lines. Error bars represent SD; and the measure of centre for the error bars represents the mean. Statistical difference was tested by the Wilcoxon rank-sum test (two-sided). The *P* values less than 0.05 are labeled. All exact *P* values are provided in the data source file.

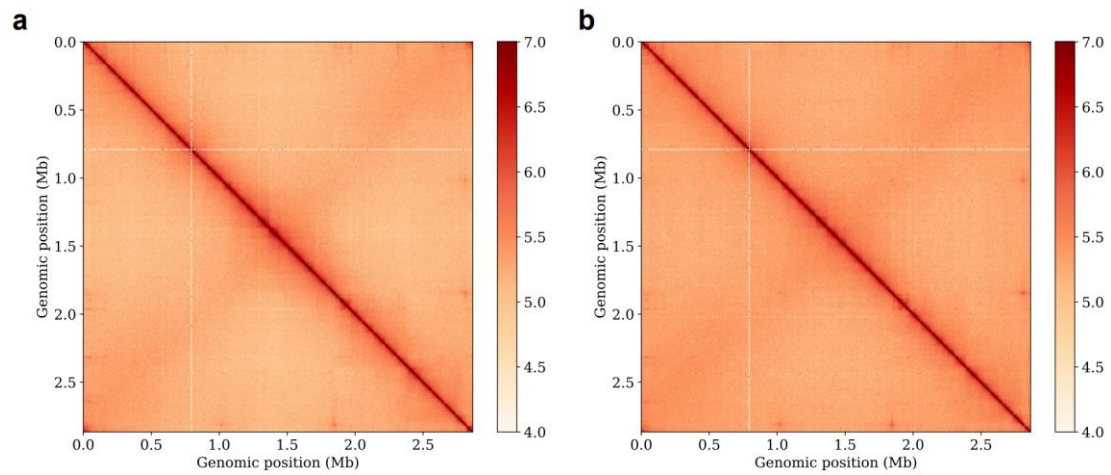

**Figure S5 High-throughput chromosome conformation capture (Hi-C) contact maps of *Lacticaseibacillus paracasei* Zhang *pgIX* mutant (a) and wild type (b).** Both x- and y-axes show the position in the reference genome (Mb). The color bar indicates the interaction intensity; and the greater the numerical value, the stronger the interaction.



**Table S1 General information of methyltransferases in 28 *Lacticaseibacillus paracasei* isolates.**

| Isolate   | Query ID        | Global identity | E-value   | Bit score | REBASE:EnzType                                                 |
|-----------|-----------------|-----------------|-----------|-----------|----------------------------------------------------------------|
| IMAU10004 | IMAU10004_01400 | 97.70           | 0         | 611       | EnzType:putative Type II methyltransferase                     |
| IMAU10004 | IMAU10004_01689 | 100.00          | 0         | 3207      | EnzType:putative Type IIG restriction enzyme/methyltransferase |
| IMAU10004 | IMAU10004_02169 | 98.17           | 0         | 1429      | EnzType:putative Type IV methyl-directed restriction enzyme    |
| IMAU10004 | IMAU10004_02170 | 97.66           | 0         | 775       | EnzType:putative Type I specificity subunit                    |
| IMAU10004 | IMAU10004_02172 | 74.74           | 5.41E-180 | 509       | EnzType:putative Type I specificity subunit                    |
| IMAU10004 | IMAU10004_02173 | 100.00          | 0         | 1100      | EnzType:putative Type I methyltransferase                      |
| IMAU10004 | IMAU10004_02174 | 100.00          | 0         | 2109      | EnzType:putative Type I restriction enzyme                     |
| IMAU10043 | IMAU10043_01924 | 99.86           | 0         | 1519      | EnzType:putative Type IIG restriction enzyme/methyltransferase |
| IMAU10043 | IMAU10043_01926 | 100.00          | 0         | 2487      | EnzType:Type II methyltransferase                              |
| IMAU10510 | IMAU10510_02100 | 92.69           | 0         | 1346      | EnzType:putative Type IV methyl-directed restriction enzyme    |
| IMAU10510 | IMAU10510_02102 | 96.94           | 2.44E-136 | 382       | EnzType:putative Type I specificity subunit                    |
| IMAU10510 | IMAU10510_02104 | 100.00          | 0         | 813       | EnzType:putative Type I specificity subunit                    |
| IMAU10510 | IMAU10510_02105 | 100.00          | 0         | 1101      | EnzType:putative Type I methyltransferase                      |
| IMAU10510 | IMAU10510_02106 | 100.00          | 0         | 2112      | EnzType:putative Type I restriction enzyme                     |
| IMAU10557 | IMAU10557_00932 | 100.00          | 0         | 801       | EnzType:putative Type II restriction enzyme                    |
| IMAU10557 | IMAU10557_00934 | 86.73           | 0         | 790       | EnzType:putative Type II methyltransferase                     |
| IMAU10557 | IMAU10557_01985 | 93.27           | 0         | 634       | EnzType:putative Type II methyltransferase                     |
| IMAU10557 | IMAU10557_02103 | 51.63           | 1.19E-128 | 367       | EnzType:putative Type II methyltransferase                     |
| IMAU10557 | IMAU10557_02239 | 100.00          | 0         | 1452      | EnzType:putative Type IV methyl-directed restriction enzyme    |
| IMAU10557 | IMAU10557_02240 | 93.78           | 0         | 762       | EnzType:putative Type I specificity subunit                    |
| IMAU10557 | IMAU10557_02242 | 73.49           | 1.78E-113 | 323       | EnzType:putative Type I specificity subunit                    |
| IMAU10557 | IMAU10557_02243 | 100.00          | 0         | 1101      | EnzType:putative Type I methyltransferase                      |
| IMAU10557 | IMAU10557_02244 | 100.00          | 0         | 2112      | EnzType:putative Type I restriction enzyme                     |

|           |                 |        |           |      |                                                             |
|-----------|-----------------|--------|-----------|------|-------------------------------------------------------------|
| IMAU10557 | IMAU10557_03106 | 99.03  | 0         | 640  | EnzType:putative Type II restriction enzyme                 |
| IMAU10557 | IMAU10557_03107 | 98.42  | 0         | 1026 | EnzType:putative Type II methyltransferase                  |
| IMAU10557 | IMAU10557_03183 | 99.03  | 0         | 640  | EnzType:putative Type II restriction enzyme                 |
| IMAU10557 | IMAU10557_03184 | 95.86  | 0         | 1001 | EnzType:putative Type II methyltransferase                  |
| IMAU10685 | IMAU10685_02033 | 77.95  | 0         | 610  | EnzType:putative Type I specificity subunit                 |
| IMAU10685 | IMAU10685_02035 | 54.43  | 1.51E-157 | 445  | EnzType:putative Type I specificity subunit                 |
| IMAU10685 | IMAU10685_02037 | 83.25  | 4.42E-125 | 353  | EnzType:putative Type I specificity subunit                 |
| IMAU10685 | IMAU10685_02038 | 100.00 | 0         | 1100 | EnzType:putative Type I methyltransferase                   |
| IMAU10685 | IMAU10685_02039 | 99.70  | 0         | 2104 | EnzType:putative Type I restriction enzyme                  |
| IMAU10685 | IMAU10685_02919 | 51.09  | 0         | 1106 | EnzType:putative Type I restriction enzyme                  |
| IMAU10685 | IMAU10685_02920 | 97.96  | 0         | 1095 | EnzType:putative Type I methyltransferase                   |
| IMAU10685 | IMAU10685_02921 | 72.44  | 0         | 536  | EnzType:putative Type I specificity subunit                 |
| PC646     | IMAU11646_02220 | 99.58  | 0         | 1446 | EnzType:putative Type IV methyl-directed restriction enzyme |
| PC646     | IMAU11646_02221 | 67.82  | 4.53E-170 | 483  | EnzType:putative Type I specificity subunit                 |
| PC646     | IMAU11646_02223 | 75.06  | 3.09E-175 | 496  | EnzType:putative Type I specificity subunit                 |
| PC646     | IMAU11646_02224 | 100.00 | 0         | 1099 | EnzType:putative Type I methyltransferase                   |
| PC646     | IMAU11646_02225 | 100.00 | 0         | 2112 | EnzType:putative Type I restriction enzyme                  |
| PC646     | IMAU11646_03112 | 52.89  | 7.06E-147 | 417  | EnzType:putative Type II methyltransferase                  |
| PC646     | IMAU11646_03125 | 72.96  | 2.71E-180 | 509  | EnzType:Type I specificity subunit                          |
| PC646     | IMAU11646_03126 | 99.07  | 0         | 1108 | EnzType:putative Type I methyltransferase                   |
| PC646     | IMAU11646_03127 | 98.96  | 0         | 2160 | EnzType:putative Type I restriction enzyme                  |
| IMAU11652 | IMAU11652_00589 | 98.70  | 0         | 1104 | EnzType:putative Type I methyltransferase                   |
| IMAU11652 | IMAU11652_00590 | 99.34  | 0         | 2163 | EnzType:putative Type I restriction enzyme                  |
| IMAU11652 | IMAU11652_00914 | 99.74  | 0         | 800  | EnzType:putative Type II restriction enzyme                 |
| IMAU11652 | IMAU11652_00915 | 102.06 | 0         | 899  | EnzType:putative Type II methyltransferase                  |
| IMAU11652 | IMAU11652_01218 | 52.32  | 1.85E-53  | 166  | EnzType:putative Type II methyltransferase                  |

|           |                 |        |           |      |                                                                |
|-----------|-----------------|--------|-----------|------|----------------------------------------------------------------|
| IMAU11652 | IMAU11652_02049 | 100.00 | 4.99E-176 | 486  | EnzType:putative Type II methyltransferase                     |
| IMAU11652 | IMAU11652_02050 | 100.00 | 0         | 3046 | EnzType:putative Type IIG restriction enzyme/methyltransferase |
| IMAU11652 | IMAU11652_02168 | 99.58  | 0         | 1447 | EnzType:putative Type IV methyl-directed restriction enzyme    |
| IMAU11652 | IMAU11652_02169 | 75.69  | 0         | 550  | EnzType:putative Type I specificity subunit                    |
| IMAU11652 | IMAU11652_02171 | 79.74  | 3.63E-174 | 494  | EnzType:putative Type I specificity subunit                    |
| IMAU11652 | IMAU11652_02172 | 99.25  | 0         | 1093 | EnzType:putative Type I methyltransferase                      |
| IMAU11652 | IMAU11652_02173 | 99.80  | 0         | 2105 | EnzType:putative Type I restriction enzyme                     |
| IMAU11652 | IMAU11652_02997 | 67.92  | 0         | 1209 | EnzType:putative Type III restriction enzyme                   |
| IMAU11652 | IMAU11652_02998 | 72.02  | 0         | 945  | EnzType:putative Type III methyltransferase                    |
| IMAU30101 | IMAU30101_01926 | 99.86  | 0         | 1519 | EnzType:putative Type IIG restriction enzyme/methyltransferase |
| IMAU30101 | IMAU30101_01928 | 100.00 | 0         | 2487 | EnzType:Type II methyltransferase                              |
| IMAU60143 | IMAU60143_00356 | 100.00 | 0         | 513  | EnzType:putative Type II methyltransferase                     |
| IMAU60143 | IMAU60143_01813 | 91.74  | 0         | 709  | EnzType:putative Type II restriction enzyme                    |
| IMAU60143 | IMAU60143_01814 | 87.42  | 0         | 601  | EnzType:putative Type II methyltransferase                     |
| IMAU60143 | IMAU60143_01852 | 98.68  | 1.32E-109 | 311  | EnzType:putative Type II methyltransferase                     |
| IMAU60143 | IMAU60143_02004 | 73.33  | 4.66E-172 | 482  | EnzType:putative Type IV methyl-directed restriction enzyme    |
| IMAU60143 | IMAU60143_02010 | 79.28  | 0         | 1922 | EnzType:putative Type II methyltransferase                     |
| IMAU60143 | IMAU60143_02228 | 98.68  | 1.32E-109 | 311  | EnzType:putative Type II methyltransferase                     |
| IMAU70001 | IMAU70001_01390 | 97.70  | 0         | 611  | EnzType:putative Type II methyltransferase                     |
| IMAU70001 | IMAU70001_01684 | 84.02  | 0         | 2704 | EnzType:putative Type IIG restriction enzyme/methyltransferase |
| IMAU70001 | IMAU70001_01694 | 84.02  | 0         | 2697 | EnzType:putative Type IIG restriction enzyme/methyltransferase |
| IMAU70001 | IMAU70001_02182 | 89.68  | 0         | 2141 | EnzType:putative Type II methyltransferase                     |
| IMAU70001 | IMAU70001_02631 | 99.56  | 4.49E-170 | 469  | EnzType:putative Type II methyltransferase                     |
| IMAU70001 | IMAU70001_02675 | 90.23  | 0         | 1769 | EnzType:putative Type IIG restriction enzyme/methyltransferase |
| IMAU70017 | IMAU70017_01372 | 97.70  | 0         | 611  | EnzType:putative Type II methyltransferase                     |
| IMAU70017 | IMAU70017_01665 | 84.02  | 0         | 2701 | EnzType:putative Type IIG restriction enzyme/methyltransferase |

|           |                 |        |           |      |                                                                |
|-----------|-----------------|--------|-----------|------|----------------------------------------------------------------|
| IMAU70017 | IMAU70017_02154 | 89.68  | 0         | 2141 | EnzType:putative Type II methyltransferase                     |
| IMAU70018 | IMAU70018_01630 | 98.55  | 0         | 560  | EnzType:putative Type II methyltransferase                     |
| PC724     | IMAU70024_02098 | 98.92  | 0         | 565  | EnzType:putative Type I specificity subunit                    |
| PC724     | IMAU70024_02102 | 99.44  | 0         | 1093 | EnzType:putative Type I methyltransferase                      |
| PC724     | IMAU70024_02103 | 99.41  | 0         | 2099 | EnzType:putative Type I restriction enzyme                     |
| IMAU70027 | IMAU70027_01671 | 66.54  | 0         | 2165 | EnzType:putative Type IIG restriction enzyme/methyltransferase |
| IMAU70027 | IMAU70027_02208 | 98.17  | 0         | 1429 | EnzType:putative Type IV methyl-directed restriction enzyme    |
| IMAU70027 | IMAU70027_02209 | 96.10  | 0         | 866  | EnzType:putative Type I specificity subunit                    |
| IMAU70027 | IMAU70027_02211 | 79.12  | 0         | 637  | EnzType:putative Type I specificity subunit                    |
| IMAU70027 | IMAU70027_02214 | 85.53  | 0         | 944  | EnzType:putative Type I methyltransferase                      |
| IMAU70027 | IMAU70027_02216 | 100.00 | 0         | 2109 | EnzType:putative Type I restriction enzyme                     |
| IMAU70038 | IMAU70038_00491 | 87.82  | 0         | 723  | EnzType:putative Type II methyltransferase                     |
| IMAU70038 | IMAU70038_00492 | 81.64  | 0         | 696  | EnzType:putative Type II restriction enzyme                    |
| IMAU70038 | IMAU70038_01968 | 79.92  | 4.08E-147 | 411  | EnzType:putative Type II methyltransferase                     |
| IMAU70038 | IMAU70038_02006 | 93.08  | 0         | 2353 | EnzType:putative Type IIG restriction enzyme/methyltransferase |
| IMAU70038 | IMAU70038_02146 | 98.31  | 0         | 1432 | EnzType:putative Type IV methyl-directed restriction enzyme    |
| IMAU70038 | IMAU70038_02147 | 95.08  | 0         | 754  | EnzType:putative Type I specificity subunit                    |
| IMAU70038 | IMAU70038_02149 | 71.57  | 5.72E-172 | 489  | EnzType:putative Type I specificity subunit                    |
| IMAU70038 | IMAU70038_02150 | 99.81  | 0         | 1098 | EnzType:putative Type I methyltransferase                      |
| IMAU70038 | IMAU70038_02151 | 100.00 | 0         | 2109 | EnzType:putative Type I restriction enzyme                     |
| IMAU70046 | IMAU70046_01967 | 96.06  | 0         | 1400 | EnzType:putative Type IV methyl-directed restriction enzyme    |
| IMAU70046 | IMAU70046_01968 | 56.09  | 2.95E-156 | 447  | EnzType:putative Type I specificity subunit                    |
| IMAU70046 | IMAU70046_01970 | 75.06  | 2.53E-160 | 459  | EnzType:putative Type I specificity subunit                    |
| IMAU70046 | IMAU70046_01971 | 100.00 | 0         | 1126 | EnzType:putative Type I methyltransferase                      |
| IMAU70046 | IMAU70046_01972 | 98.16  | 0         | 2105 | EnzType:putative Type I restriction enzyme                     |
| IMAU70046 | IMAU70046_02430 | 100.00 | 0         | 513  | EnzType:putative Type II methyltransferase                     |

|           |                 |        |           |      |                                                                |
|-----------|-----------------|--------|-----------|------|----------------------------------------------------------------|
| IMAU70046 | IMAU70046_02782 | 98.67  | 0         | 2154 | EnzType:putative Type I restriction enzyme                     |
| IMAU70046 | IMAU70046_02783 | 98.70  | 0         | 1106 | EnzType:putative Type I methyltransferase                      |
| IMAU70046 | IMAU70046_02784 | 82.35  | 5.01E-174 | 495  | EnzType:putative Type I specificity subunit                    |
| IMAU70057 | IMAU70057_01997 | 100.00 | 4.99E-176 | 486  | EnzType:putative Type II methyltransferase                     |
| IMAU70057 | IMAU70057_01999 | 91.33  | 0         | 2786 | EnzType:putative Type IIG restriction enzyme/methyltransferase |
| IMAU70057 | IMAU70057_02126 | 99.86  | 0         | 1450 | EnzType:putative Type IV methyl-directed restriction enzyme    |
| IMAU70057 | IMAU70057_02127 | 60.71  | 1.43E-83  | 245  | EnzType:putative Type I specificity subunit                    |
| IMAU70057 | IMAU70057_02128 | 59.12  | 1.09E-175 | 492  | EnzType:putative Type I specificity subunit                    |
| IMAU70057 | IMAU70057_02130 | 73.13  | 0         | 515  | EnzType:putative Type I specificity subunit                    |
| IMAU70057 | IMAU70057_02131 | 100.00 | 0         | 1101 | EnzType:putative Type I methyltransferase                      |
| IMAU70057 | IMAU70057_02132 | 100.00 | 0         | 2112 | EnzType:putative Type I restriction enzyme                     |
| IMAU70057 | IMAU70057_03015 | 57.10  | 0         | 1114 | EnzType:putative Type IIG restriction enzyme/methyltransferase |
| IMAU70061 | IMAU70061_02182 | 85.69  | 0         | 2065 | EnzType:putative Type II methyltransferase                     |
| IMAU70061 | IMAU70061_02400 | 90.12  | 1.14E-108 | 309  | EnzType:putative Type II methyltransferase                     |
| IMAU70061 | IMAU70061_02401 | 70.00  | 2.65E-130 | 372  | EnzType:putative Type II methyltransferase                     |
| IMAU70061 | IMAU70061_02606 | 93.03  | 3.36E-178 | 492  | EnzType:putative Type II methyltransferase                     |
| IMAU70061 | IMAU70061_02618 | 99.70  | 0         | 2036 | EnzType:putative Type III restriction enzyme                   |
| IMAU70061 | IMAU70061_02619 | 99.52  | 0         | 1281 | EnzType:putative Type III methyltransferase                    |
| IMAU70061 | IMAU70061_02622 | 59.70  | 7.54E-24  | 88.2 | EnzType:putative control protein                               |
| IMAU70083 | IMAU70083_02830 | 100.00 | 0         | 699  | EnzType:putative Type II methyltransferase                     |
| IMAU70083 | IMAU70083_02860 | 93.44  | 5.85E-173 | 479  | EnzType:putative Type II methyltransferase                     |
| IMAU70083 | IMAU70083_02888 | 73.80  | 0         | 1039 | EnzType:putative Type IIG restriction enzyme/methyltransferase |
| IMAU70083 | IMAU70083_02892 | 86.70  | 0         | 2065 | EnzType:putative Type IIG restriction enzyme/methyltransferase |
| IMAU70083 | IMAU70083_03037 | 100.00 | 0         | 1452 | EnzType:putative Type IV methyl-directed restriction enzyme    |
| IMAU70083 | IMAU70083_03038 | 100.00 | 0         | 784  | EnzType:putative Type I specificity subunit                    |
| IMAU70083 | IMAU70083_03040 | 69.55  | 0         | 543  | EnzType:putative Type I specificity subunit                    |

|           |                 |        |           |      |                                                                |
|-----------|-----------------|--------|-----------|------|----------------------------------------------------------------|
| IMAU70083 | IMAU70083_03041 | 100.00 | 0         | 1101 | EnzType:putative Type I methyltransferase                      |
| IMAU70083 | IMAU70083_03042 | 100.00 | 0         | 2112 | EnzType:putative Type I restriction enzyme                     |
| IMAU80010 | IMAU80010_00598 | 61.54  | 6.76E-164 | 469  | EnzType:putative Type I specificity subunit                    |
| IMAU80010 | IMAU80010_00599 | 99.63  | 0         | 1112 | EnzType:putative Type I methyltransferase                      |
| IMAU80010 | IMAU80010_00600 | 98.67  | 0         | 2154 | EnzType:putative Type I restriction enzyme                     |
| IMAU80010 | IMAU80010_01951 | 99.60  | 0         | 530  | EnzType:putative Type II methyltransferase                     |
| IMAU80010 | IMAU80010_02191 | 98.03  | 0         | 1427 | EnzType:putative Type IV methyl-directed restriction enzyme    |
| IMAU80010 | IMAU80010_02192 | 72.85  | 0         | 568  | EnzType:putative Type I specificity subunit                    |
| IMAU80010 | IMAU80010_02194 | 95.59  | 0         | 800  | EnzType:putative Type I specificity subunit                    |
| IMAU80010 | IMAU80010_02195 | 100.00 | 0         | 1127 | EnzType:putative Type I methyltransferase                      |
| IMAU80010 | IMAU80010_02196 | 98.83  | 0         | 2116 | EnzType:putative Type I restriction enzyme                     |
| PC804     | IMAU80040_00345 | 75.59  | 0         | 1590 | EnzType:putative Type I restriction enzyme                     |
| PC804     | IMAU80040_00346 | 100.00 | 0         | 1100 | EnzType:putative Type I methyltransferase                      |
| PC804     | IMAU80040_00347 | 50.94  | 4.85E-96  | 280  | EnzType:putative Type I specificity subunit                    |
| PC804     | IMAU80040_00352 | 95.83  | 0         | 805  | EnzType:putative Type I specificity subunit                    |
| PC804     | IMAU80040_00353 | 98.31  | 0         | 1432 | EnzType:putative Type IV methyl-directed restriction enzyme    |
| PC804     | IMAU80040_00475 | 91.33  | 0         | 2788 | EnzType:putative Type IIG restriction enzyme/methyltransferase |
| PC804     | IMAU80040_00477 | 100.00 | 4.99E-176 | 486  | EnzType:putative Type II methyltransferase                     |
| PC804     | IMAU80040_02981 | 99.66  | 0         | 2436 | EnzType:putative Type IIG restriction enzyme/methyltransferase |
| IMAU80044 | IMAU80044_01670 | 94.88  | 0         | 1923 | EnzType:putative Type IIG restriction enzyme/methyltransferase |
| IMAU80044 | IMAU80044_02167 | 75.25  | 1.58E-178 | 506  | EnzType:putative Type I specificity subunit                    |
| IMAU80044 | IMAU80044_02169 | 95.14  | 0         | 759  | EnzType:putative Type I specificity subunit                    |
| IMAU80044 | IMAU80044_02170 | 100.00 | 0         | 1100 | EnzType:putative Type I methyltransferase                      |
| IMAU80044 | IMAU80044_02171 | 100.00 | 0         | 2108 | EnzType:putative Type I restriction enzyme                     |
| IMAU80047 | IMAU80047_01669 | 94.88  | 0         | 1923 | EnzType:putative Type IIG restriction enzyme/methyltransferase |
| IMAU80047 | IMAU80047_02165 | 75.25  | 1.58E-178 | 506  | EnzType:putative Type I specificity subunit                    |

|           |                 |        |           |      |                                                                |
|-----------|-----------------|--------|-----------|------|----------------------------------------------------------------|
| IMAU80047 | IMAU80047_02167 | 95.14  | 0         | 759  | EnzType:putative Type I specificity subunit                    |
| IMAU80047 | IMAU80047_02168 | 100.00 | 0         | 1100 | EnzType:putative Type I methyltransferase                      |
| IMAU80047 | IMAU80047_02169 | 100.00 | 0         | 2108 | EnzType:putative Type I restriction enzyme                     |
| IMAU80048 | IMAU80048_01446 | 75.59  | 0         | 1590 | EnzType:putative Type I restriction enzyme                     |
| IMAU80048 | IMAU80048_01447 | 100.00 | 0         | 1100 | EnzType:putative Type I methyltransferase                      |
| IMAU80048 | IMAU80048_01451 | 68.06  | 7.82E-162 | 461  | EnzType:putative Type I specificity subunit                    |
| IMAU80048 | IMAU80048_01453 | 98.31  | 0         | 1432 | EnzType:putative Type IV methyl-directed restriction enzyme    |
| IMAU80048 | IMAU80048_01561 | 91.33  | 0         | 2788 | EnzType:putative Type IIG restriction enzyme/methyltransferase |
| IMAU80048 | IMAU80048_01563 | 100.00 | 4.99E-176 | 486  | EnzType:putative Type II methyltransferase                     |
| IMAU80077 | IMAU80077_02185 | 59.41  | 5.62E-81  | 239  | EnzType:putative Type I specificity subunit                    |
| IMAU80077 | IMAU80077_02187 | 97.02  | 0         | 797  | EnzType:putative Type I specificity subunit                    |
| IMAU80077 | IMAU80077_02188 | 100.00 | 0         | 1100 | EnzType:putative Type I methyltransferase                      |
| IMAU80077 | IMAU80077_02189 | 99.80  | 0         | 2104 | EnzType:putative Type I restriction enzyme                     |
| IMAU80077 | IMAU80077_02667 | 99.59  | 0         | 513  | EnzType:putative Type II methyltransferase                     |
| IMAU80077 | IMAU80077_02701 | 66.12  | 0         | 1299 | EnzType:putative Type IIG restriction enzyme/methyltransferase |
| IMAU80079 | IMAU80079_02188 | 59.41  | 5.62E-81  | 239  | EnzType:putative Type I specificity subunit                    |
| IMAU80079 | IMAU80079_02190 | 97.02  | 0         | 797  | EnzType:putative Type I specificity subunit                    |
| IMAU80079 | IMAU80079_02191 | 100.00 | 0         | 1100 | EnzType:putative Type I methyltransferase                      |
| IMAU80079 | IMAU80079_02192 | 99.80  | 0         | 2104 | EnzType:putative Type I restriction enzyme                     |
| IMAU80079 | IMAU80079_02672 | 99.59  | 0         | 513  | EnzType:putative Type II methyltransferase                     |
| IMAU80079 | IMAU80079_02704 | 66.12  | 0         | 1299 | EnzType:putative Type IIG restriction enzyme/methyltransferase |
| IMAU80116 | IMAU80116_00959 | 89.45  | 0         | 511  | EnzType:putative Type II methyltransferase                     |
| IMAU80116 | IMAU80116_01342 | 97.70  | 0         | 611  | EnzType:putative Type II methyltransferase                     |
| IMAU80116 | IMAU80116_01634 | 99.94  | 0         | 3207 | EnzType:putative Type IIG restriction enzyme/methyltransferase |
| IMAU80116 | IMAU80116_02175 | 58.93  | 0         | 848  | EnzType:putative Type IV methyl-directed restriction enzyme    |
| IMAU80116 | IMAU80116_02176 | 97.66  | 0         | 775  | EnzType:putative Type I specificity subunit                    |

|           |                 |        |           |      |                                                                |
|-----------|-----------------|--------|-----------|------|----------------------------------------------------------------|
| IMAU80116 | IMAU80116_02178 | 74.74  | 5.41E-180 | 509  | EnzType:putative Type I specificity subunit                    |
| IMAU80116 | IMAU80116_02179 | 100.00 | 0         | 1100 | EnzType:putative Type I methyltransferase                      |
| IMAU80116 | IMAU80116_02180 | 99.90  | 0         | 2107 | EnzType:putative Type I restriction enzyme                     |
| IMAU80116 | IMAU80116_02703 | 52.05  | 3.33E-91  | 266  | EnzType:putative Type II methyltransferase                     |
| Zhang     | LCAZH_2054      | 99.86  | 0         | 1519 | EnzType:putative Type IIG restriction enzyme/methyltransferase |
| Zhang     | LCAZH_2056      | 100.00 | 0         | 2487 | EnzType:Type II methyltransferase                              |

---



**Table S2 Differentially expressed genes in *pglX* mutant in comparison with its wild type.**

| <b>Gene locus</b> | <b>Gene description</b>                                         | <b>Fold change</b> | <b>Gene name</b> |
|-------------------|-----------------------------------------------------------------|--------------------|------------------|
| LCAZH_0009        | deoxyribose-phosphate aldolase                                  | 1.57               | deoC             |
| LCAZH_0020        | metal-dependent membrane protease                               | 1.63               | -                |
| LCAZH_0022        | hypothetical protein                                            | 2.10               | -                |
| LCAZH_0057        | metal-dependent membrane protease                               | 1.80               | -                |
| LCAZH_0058        | 2-keto-3-deoxy-6-phosphogluconate aldolase                      | 3.51               | eda              |
| LCAZH_0060        | hypothetical protein                                            | 2.26               | -                |
| LCAZH_0061        | hypothetical protein                                            | 2.25               | -                |
| LCAZH_0063        | multidrug ABC transporter ATPase/permease                       | 1.03               | -                |
| LCAZH_0095        | hypothetical protein                                            | 1.18               | -                |
| LCAZH_0096        | hypothetical protein                                            | 1.05               | -                |
| LCAZH_0097        | ABC transporter ATP-binding protein                             | 1.18               | ABC-2.A          |
| LCAZH_0117        | phospholipase A2 family enzyme                                  | 1.57               | -                |
| LCAZH_0118        | hypothetical protein                                            | 1.56               | -                |
| LCAZH_0187        | helicase subunit of the Holliday junction resolvase-like ATPase | 1.47               | ycaJ             |
| LCAZH_0188        | acetate kinase                                                  | 1.32               | ackA             |
| LCAZH_0190        | hypothetical protein                                            | 2.02               | -                |
| LCAZH_0191        | hypothetical protein                                            | 2.14               | fbaA             |
| LCAZH_0192        | PTS system ascorbate-specific transporter subunit IIC           | 1.86               | ulaA             |
| LCAZH_0218        | flavodoxin                                                      | 1.25               | -                |
| LCAZH_0257        | inositol dehydrogenase                                          | 1.11               | iolG             |
| LCAZH_0264        | H <sup>+</sup> /gluconate symporter-like permease               | 1.72               | TC.GNTP          |
| LCAZH_0311        | lacto-N-biosidase                                               | 2.89               | HEXA_B           |
| LCAZH_0330        | hypothetical protein                                            | 1.33               | patB             |
| LCAZH_0331        | peptidase                                                       | 1.63               | pepP             |
| LCAZH_0332        | PTS system transporter subunit IIC                              | 1.72               | celB             |
| LCAZH_0335        | endoglucanase                                                   | 2.11               | -                |
| LCAZH_0336        | transcription antiterminator                                    | 2.49               | licR             |
| LCAZH_0341        | hypothetical protein                                            | 1.85               | -                |
| LCAZH_0353        | hypothetical protein                                            | 1.03               | -                |
| LCAZH_0357        | ribose/xylose/arabinose/galactoside ABC transporter permease    | 1.85               | rbsC             |
| LCAZH_0358        | sugar ABC transporter periplasmic protein                       | 1.63               | rbsB             |
| LCAZH_0371        | hypothetical protein                                            | 1.03               | -                |
| LCAZH_0377        | transcriptional antiterminator and PTS system component IIA     | 2.14               | -                |
| LCAZH_0378        | PTS system galactitol-specific transporter subunit IIB          | 2.20               | ulaB             |
| LCAZH_0379        | hypothetical protein                                            | 2.08               | ulaA             |

|            |                                                                                    |      |               |
|------------|------------------------------------------------------------------------------------|------|---------------|
| LCAZH_0380 | hypothetical protein                                                               | 2.93 | -             |
| LCAZH_0381 | fructose/tagatose bisphosphate aldolase                                            | 1.94 | fbaA          |
| LCAZH_0402 | levA protein                                                                       | 4.11 | agaF          |
| LCAZH_0403 | PTS system mannose/fructose/N-acetylgalactosamine-specific transporter subunit IIB | 3.92 | manX          |
| LCAZH_0404 | levC protein                                                                       | 3.89 | manY          |
| LCAZH_0405 | PTS system mannose/fructose/N-acetylgalactosamine-specific transporter subunit IID | 4.02 | -             |
| LCAZH_0406 | hypothetical protein                                                               | 4.05 | -             |
| LCAZH_0407 | fructan hydrolase                                                                  | 5.16 | fruA          |
| LCAZH_0413 | 6-phospho 3-hexuloisomerase                                                        | 1.27 | hxlB          |
| LCAZH_0449 | oxidoreductase                                                                     | 1.14 | ohyA          |
| LCAZH_0456 | redox protein%2C regulator of disulfide bond formation                             | 1.41 | osmC          |
| LCAZH_0540 | hypothetical protein                                                               | 1.28 | -             |
| LCAZH_0542 | hypothetical protein                                                               | 1.08 | -             |
| LCAZH_0554 | l-lactate dehydrogenase                                                            | 2.10 | ldh           |
| LCAZH_0559 | redox protein%2C regulator of disulfide bond formation                             | 1.68 | osmC          |
| LCAZH_0603 | PTS system galactitol-specific transporter subunit IIA                             | 1.92 | gatA          |
| LCAZH_0604 | PTS system galactitol-specific transporter subunit IIB                             | 1.73 | gatB          |
| LCAZH_0605 | PTS system galactitol transporter subunit EIIC                                     | 1.32 | gatC          |
| LCAZH_0606 | hypothetical protein                                                               | 1.18 | -             |
| LCAZH_0728 | hypothetical protein                                                               | 1.21 | -             |
| LCAZH_0802 | comX                                                                               | 1.59 | -             |
| LCAZH_0870 | ribosome-associated protein Y (PSrp-1)                                             | 1.03 | -             |
| LCAZH_0927 | alpha-glucosidase                                                                  | 1.10 | dexB          |
| LCAZH_0928 | sugar ABC transporter periplasmic protein                                          | 1.56 | cycB,<br>ganO |
| LCAZH_0931 | maltose ABC transporter permease                                                   | 1.40 | ganQ          |
| LCAZH_1074 | Zn-dependent protease                                                              | 1.04 |               |
| LCAZH_1299 | PDH (acetyl-transferring) E1 component subunit alpha                               | 1.35 | pdhA          |
| LCAZH_1300 | PDH E1 component beta subunit                                                      | 1.34 | pdhB          |
| LCAZH_1301 | dihydrolipoamide acetyltransferase                                                 | 1.41 | pdhC          |
| LCAZH_1302 | dihydrolipoamide dehydrogenase                                                     | 1.42 | pdhD          |
| LCAZH_1372 | hypothetical protein                                                               | 1.47 | -             |
| LCAZH_1396 | pyruvate-formate lyase                                                             | 2.13 | pflD          |
| LCAZH_1398 | pyruvate-formate lyase-activating enzyme                                           | 1.43 | pflA          |
| LCAZH_1431 | dihydrolipoamide acetyltransferase family                                          | 1.56 | bkdB          |

|            |                                                                                 |      |       |
|------------|---------------------------------------------------------------------------------|------|-------|
| LCAZH_1432 | alpha-ketoacid dehydrogenase subunit beta                                       | 1.14 | bkdA2 |
| LCAZH_1433 | thiamine pyrophosphate-dependent<br>dehydrogenase E1 component subunit alpha    | 1.24 | bkdA1 |
| LCAZH_1435 | acetate kinase                                                                  | 1.04 | buk   |
| LCAZH_1463 | lipoate-protein ligase A                                                        | 1.50 | lplA  |
| LCAZH_1464 | hypothetical protein                                                            | 1.39 | -     |
| LCAZH_1509 | hypothetical protein                                                            | 1.21 | ppsR  |
| LCAZH_1774 | pyruvate oxidase or other thiamine<br>pyrophosphate-requiring enzyme            | 1.42 | poxL  |
| LCAZH_1782 | aldose 1-epimerase                                                              | 1.15 | -     |
| LCAZH_1883 | hypothetical protein                                                            | 1.09 | -     |
| LCAZH_2129 | hypothetical protein                                                            | 2.03 | -     |
| LCAZH_2142 | alanine dehydrogenase                                                           | 1.36 | ald   |
| LCAZH_2143 | threonine dehydratase                                                           | 1.23 | ilvA  |
| LCAZH_2144 | hypothetical protein                                                            | 1.19 | -     |
| LCAZH_2145 | hypothetical protein                                                            | 1.28 | -     |
| LCAZH_2146 | dipeptidase                                                                     | 1.03 | pepDA |
| LCAZH_2151 | beta-glucosidase/6-phospho-beta-<br>glucosidase/beta-galactosidase              | 1.96 | bglA  |
| LCAZH_2152 | PTS system trehalose transporter subunit IIBC                                   | 2.59 | bglF  |
| LCAZH_2336 | hypothetical protein                                                            | 1.85 | -     |
| LCAZH_2346 | hypothetical protein                                                            | 1.07 | -     |
| LCAZH_2347 | lactococcin A ABC transporter permease                                          | 1.12 | blpB  |
| LCAZH_2348 | ABC transporter                                                                 | 1.16 | blpA  |
| LCAZH_2349 | hypothetical protein                                                            | 1.61 |       |
| LCAZH_2350 | sensor histidine kinase PrcK                                                    | 1.22 | agrC, |
| LCAZH_2351 | response regulator of the LytR/AlgR family                                      | 1.40 | agrA  |
| LCAZH_2361 | hypothetical protein                                                            | 1.81 | -     |
| LCAZH_2362 | immunity protein PlnI%2C membrane-bound<br>protease CAAX family                 | 1.10 | -     |
| LCAZH_2563 | galactose mutarotase-like protein                                               | 1.49 | -     |
| LCAZH_2632 | PTS system galactitol-specific transporter<br>subunit IIC                       | 1.20 | gatC  |
| LCAZH_2635 | 2-dehydro-3-deoxyphosphogluconate<br>aldolase/4-hydroxy-2-oxoglutarate aldolase | 1.82 | eda   |
| LCAZH_2636 | transcriptional antiterminator                                                  | 1.72 | -     |
| LCAZH_2637 | PTS system cellobiose-specific transporter<br>subunit IIA                       | 2.78 | celC  |
| LCAZH_2638 | PTS system cellobiose-specific transporter<br>subunit IIB                       | 2.80 | celA  |
| LCAZH_2639 | beta-glucosidase                                                                | 2.16 | bglA  |
| LCAZH_2640 | transcriptional regulator/sugar kinase                                          | 1.91 |       |
| LCAZH_2641 | hypothetical protein                                                            | 2.12 |       |
| LCAZH_2642 | alpha-mannosidase                                                               | 2.05 | mngB  |

|            |                                                                                    |      |      |
|------------|------------------------------------------------------------------------------------|------|------|
| LCAZH_2643 | PTS system cellobiose-specific transporter subunit IIC                             | 2.25 | -    |
| LCAZH_2645 | hypothetical protein                                                               | 4.49 | fucA |
| LCAZH_2646 | hypothetical protein                                                               | 4.39 |      |
| LCAZH_2647 | PTS system galactitol transporter subunit EIIC                                     | 3.85 | gatC |
| LCAZH_2648 | PTS system galactitol transporter subunit EIIB                                     | 2.93 | gatB |
| LCAZH_2649 | PTS system galactitol transporter subunit EIIA                                     | 2.87 | gatA |
| LCAZH_2658 | subtilisin-like serine protease                                                    | 1.89 | -    |
| LCAZH_2659 | hypothetical protein                                                               | 2.53 | -    |
| LCAZH_2660 | hypothetical protein                                                               | 2.53 | -    |
| LCAZH_2661 | preprotein translocase subunit YajC                                                | 2.82 | yajC |
| LCAZH_2662 | PTS system mannose/fructose-specific transporter subunit IIA                       | 2.48 | agaF |
| LCAZH_2663 | PTS system mannose-specific transporter subunit IID                                | 3.22 | agaE |
| LCAZH_2664 | PTS system N-acetylgalactosamine transporter subunit EIIC                          | 3.26 | agaW |
| LCAZH_2665 | PTS system mannose/fructose/N-acetylgalactosamine-specific transporter subunit IIB | 3.11 | agaV |
| LCAZH_2666 | glucuronyl hydrolase                                                               | 2.64 | ugl  |
| LCAZH_2667 | hypothetical protein                                                               | 2.07 | -    |
| LCAZH_2669 | 5-keto 4-deoxyuronate isomerase                                                    | 2.33 | kduI |
| LCAZH_2670 | short-chain alcohol dehydrogenase                                                  | 2.31 | kduD |
| LCAZH_2682 | mannose-6-phosphate isomerase                                                      | 1.32 | glvA |
| LCAZH_2692 | RpiR family transcriptional regulator                                              | 1.86 | -    |
| LCAZH_2693 | PTS system transporter subunit IIA                                                 | 2.33 | crr  |
| LCAZH_2696 | hypothetical protein                                                               | 1.98 | -    |
| LCAZH_2697 | triosephosphate isomerase                                                          | 1.67 | tpiA |
| LCAZH_2698 | fructose/tagatose biphosphate aldolase                                             | 1.82 | fbaA |
| LCAZH_2699 | PTS system galactitol-specific transporter subunit IIB                             | 3.35 | gatB |
| LCAZH_2700 | PTS system galactitol transporter subunit EIIC                                     | 1.64 | gatC |
| LCAZH_2701 | PTS system galactitol-specific transporter subunit IIA                             | 2.71 | gatA |
| LCAZH_2702 | hypothetical protein                                                               | 3.46 | -    |
| LCAZH_2703 | transcriptional antiterminator                                                     | 2.76 | manR |
| LCAZH_2704 | hypothetical protein                                                               | 2.51 | -    |
| LCAZH_2720 | hypothetical protein                                                               | 1.06 | -    |
| LCAZH_2722 | hypothetical protein                                                               | 1.27 | -    |
| LCAZH_2727 | PTS system sorbitol transporter subunit EIIA                                       | 1.08 | srlB |
| LCAZH_2728 | PTS system sorbitol transporter subunit EIIBC                                      | 1.30 | srlE |
| LCAZH_2729 | PTS system sorbitol transporter subunit EIIC                                       | 1.42 | srlA |
| LCAZH_2731 | sorbitol operon transcription regulator                                            | 1.56 | -    |

|            |                                                               |       |        |
|------------|---------------------------------------------------------------|-------|--------|
| LCAZH_2732 | sorbitol-6-phosphate dehydrogenase                            | 1.77  | srlD   |
| LCAZH_2733 | ribulose-5-phosphate 4-epimerase-like epimerase/aldolase      | 2.02  | araD   |
| LCAZH_2734 | HAD superfamily hydrolase                                     | 1.02  | -      |
| LCAZH_2735 | L-xylulose-5-phosphate 3-epimerase                            | 3.12  | ulaE   |
| LCAZH_2736 | lactose transport regulator                                   | 1.23  | -      |
| LCAZH_2737 | 3-hexulose-6-phosphate synthase                               | 1.03  | ulaD   |
| LCAZH_2738 | PTS system galactitol-specific transporter subunit IIB        | 1.07  | ulaB   |
| LCAZH_2739 | hypothetical protein                                          | 1.63  | ulaA   |
| LCAZH_2740 | PTS system mannitol/fructose-specific transporter subunit IIA | 1.70  | ulaC   |
| LCAZH_2741 | Zn-dependent hydrolase of the beta-lactamase fold             | 1.84  | ulaG   |
| LCAZH_2744 | PTS system mannitol/fructose-specific transporter subunit IIA | 2.39  | fruB   |
| LCAZH_2747 | sorbitol operon transcription regulator                       | 1.54  | manR   |
| LCAZH_2753 | major facilitator superfamily permease                        | 1.29  |        |
| LCAZH_2755 | alpha-L-fucosidase                                            | 1.27  | FUCA   |
| LCAZH_2767 | alcohol dehydrogenase                                         | 1.01  | -      |
| LCAZH_2839 | aryl-alcohol dehydrogenase-like protein                       | 1.40  | -      |
| LCAZH_2841 | PTS system mannose-specific transporter subunit IID           | 1.22  | manZ   |
| LCAZH_2842 | PTS system mannose-specific transporter subunit IIC           | 1.29  | manY   |
| LCAZH_2843 | PTS system mannose/fructose-specific transporter subunit IIA  | 1.29  | manXa  |
| LCAZH_2897 | HAD superfamily hydrolase                                     | 1.03  | -      |
| LCAZH_2936 | sugar ABC transporter permease                                | 1.42  | ganP   |
| LCAZH_2967 | ketohydroxyglutarate aldolase                                 | 2.20  | eda    |
| LCAZH_2968 | 2-dehydro-3-deoxygluconokinase                                | 2.30  | kdgK   |
| LCAZH_0201 | oligopeptide ABC transporter periplasmic protein              | -1.05 | oppA   |
| LCAZH_0280 | ABC transporter ATPase                                        | -1.36 | -      |
| LCAZH_0484 | hypothetical protein                                          | -1.23 | -      |
| LCAZH_0485 | hypothetical protein                                          | -1.24 | -      |
| LCAZH_0486 | surface protein                                               | -1.29 | -      |
| LCAZH_0487 | sortase                                                       | -1.20 | srtA   |
| LCAZH_0754 | catabolite control protein A                                  | -1.33 | lacI   |
| LCAZH_0987 | gamma-aminobutyrate permease-like permease                    | -1.32 | TC.AAT |
| LCAZH_0988 | 1-acyl-sn-glycerol-3-phosphate acyltransferase                | -1.16 | -      |
| LCAZH_0989 | lipopolysaccharide biosynthesis glycosyltransferase           | -1.11 | -      |
| LCAZH_0991 | 1-acyl-sn-glycerol-3-phosphate acyltransferase                | -1.04 | -      |

---

|               |                                                                 |       |      |
|---------------|-----------------------------------------------------------------|-------|------|
| LCAZH_1116    | DNA-entry nuclease                                              | -1.48 | endA |
| LCAZH_1117    | hypothetical protein                                            | -1.57 | -    |
| LCAZH_1275    | major facilitator superfamily permease                          | -1.32 | -    |
| LCAZH_1335    | PTS system mannitol/fructose-specific transporter subunit IIABC | -5.47 | fruB |
| LCAZH_1336    | tagatose-6-phosphate kinase                                     | -5.26 | fruK |
| LCAZH_1337    | lactose transport regulator                                     | -5.37 | fruR |
| LCAZH_1351    | 6-phosphofructokinase                                           | -1.23 | pfkA |
| LCAZH_1352    | pyruvate kinase                                                 | -1.06 | pyk  |
| LCAZH_1360    | hypothetical protein                                            | -1.56 | -    |
| LCAZH_1749    | sugar permease                                                  | -1.53 | iolT |
| LCAZH_1838    | hypothetical protein                                            | -2.15 | -    |
| LCAZH_1872    | major facilitator superfamily permease                          | -1.23 | -    |
| LCAZH_1929    | amino acid transporter                                          | -1.30 | -    |
| LCAZH_1988    | Clp protease/DnaK/DnaJ chaperone ATP-binding subunit            | -1.07 | clpL |
| LCAZH_2066    | nucleoside-diphosphate-sugar epimerase                          | -1.15 | -    |
| LCAZH_2071    | 3-hydroxymyristoyl-ACP dehydratase                              | -1.01 | fabZ |
| LCAZH_2072    | biotin carboxyl carrier protein                                 | -1.12 | accB |
| LCAZH_2150    | transcriptional regulator                                       | -1.24 | lmrA |
| LCAZH_2192    | cell wall-associated hydrolase                                  | -1.31 | -    |
| LCAZH_2308    | phosphoenolpyruvate synthase/pyruvate phosphate dikinase        | -1.14 | ppdK |
| LCAZH_RS00165 | putative holin-like toxin                                       | -1.02 | -    |

---

**Table S3 Composition of the chemical defined medium.**

| <b>Component</b>                     | <b>Content (g/L)</b> | <b>Component</b> | <b>Content (g/L)</b> | <b>Component</b>      | <b>Content (g/L)</b> |
|--------------------------------------|----------------------|------------------|----------------------|-----------------------|----------------------|
| Glucose                              | 10                   | Alanine          | 0.1                  | Niacin                | 0.001                |
| Sodium acetate                       | 5                    | Arginine         | 0.1                  | Pantothenic acid      | 0.001                |
| KH <sub>2</sub> PO <sub>4</sub>      | 3                    | Aspartic acid    | 0.2                  | Pyridoxine            | 0.002                |
| K <sub>2</sub> HPO <sub>4</sub>      | 3                    | Cysteinic acid   | 0.2                  | Riboflavin            | 0.001                |
| MgSO <sub>4</sub> ·7H <sub>2</sub> O | 0.2                  | Glutamine        | 0.2                  | Parahydrobenzoic acid | 0.01                 |
| MnSO <sub>4</sub> ·4H <sub>2</sub> O | 0.05                 | Glutamic acid    | 0.2                  | Folic acid            | 0.001                |
| FeSO <sub>4</sub> ·7H <sub>2</sub> O | 0.02                 | Glycine          | 0.1                  | Cyanoglycosamine      | 0.001                |
| Tween 80                             | 1                    | Histidonic acid  | 0.1                  | D-biotin              | 0.01                 |
|                                      |                      | Isoleucine       | 0.1                  | Thiamine-sol          | 0.01                 |
|                                      |                      | Leucine          | 0.1                  | Inosine               | 0.01                 |
|                                      |                      | Lysergic acid    | 0.1                  | Adenosine             | 0.01                 |
|                                      |                      | Phenylalanine    | 0.1                  | Xanthan Ridge         | 0.01                 |
|                                      |                      | Methionine       | 0.1                  | Uracadine             | 0.01                 |
|                                      |                      | Proline          | 0.1                  | Thymidine             | 0.01                 |
|                                      |                      | Serine           | 0.1                  |                       |                      |
|                                      |                      | Threonine        | 0.1                  |                       |                      |
|                                      |                      | Tryptophan       | 0.1                  |                       |                      |
|                                      |                      | Tyrosine         | 0.1                  |                       |                      |
|                                      |                      | Valine           | 0.1                  |                       |                      |
