# Supplementary material for: Roles of adenine methylation in the physiology of Lacticaseibacillus paracasei
Source: PubMed Central journal article supplement (PMC10164179; doi:10.1038/s41467-023-38291-1), 2023-05-06
Supplement: 41467_2023_38291_MOESM2_ESM.pdf [file 41467_2023_38291_MOESM2_ESM.pdf]

## **Description of Additional Supplementary Files:**

**Supplementary Data 1:** Differentially expressed proteins in pgIX mutant in comparison with its wild type.

**Supplementary Data 2:** Altered expression of carbohydrate metabolism-related genes in unique interaction (UI) regions, chromosomal interaction domain (CID) regions, and insulation areas (IAs) in pgIX mutant.

**Supplementary Data 3:** Distribution of transcription factor binding site (TFBS) motifs across 28 *Lactocaseibacillus paracasei* isolates.

**Supplementary Data 4:** Information of downstream genes of the conserved motifs.

**Supplementary Data 5:** Information of primers used in real timequantitative polymerase chain reactions (RT-qPCRs).
